# Supplementary material for: Physiological and Molecular Responses of Woody Plants Exposed to Future Atmospheric CO2 Levels under Abiotic Stresses
Source: Plants (Basel). 2022 Jul 20;11(14):1880. doi: 10.3390/plants11141880 (PMC9322912; doi:10.3390/plants11141880)
Supplement: Supplementary file 1 [file plants-11-01880-s001.zip › plants-1781594-supplementary.pdf]

## Supplementary material

# Physiological and molecular responses of woody plants exposed to future atmospheric CO<sub>2</sub> levels under abiotic stresses

Number of Tables: 1

**Table S1.** Overview of studies with woody species exposed to elevated [CO<sub>2</sub>] alone or combined with abiotic stresses.

\*Studies involving molecular approaches. Description of the abbreviations present in the table: **WUE**: Water use efficiency; **gs**: stomatal conductance; **E**: transpiration rate; **Chl**: Chlorophyll; **ABA**: Absciscic acid; **iWUE**: Intrinsic water use efficiency; **PS**: Photosystem; **GLO**: Glycolate oxidase; **PPP**: Pentose phosphate pathway

| Species                                                 | e[CO <sub>2</sub> ]         | Interaction with other abiotic stress | Main effect of e[CO <sub>2</sub> ] sole or combined with abiotic stress                                                                                                                                                                                                                                                                              | Reference |
|---------------------------------------------------------|-----------------------------|---------------------------------------|------------------------------------------------------------------------------------------------------------------------------------------------------------------------------------------------------------------------------------------------------------------------------------------------------------------------------------------------------|-----------|
| <i>Acacia karroo</i> and <i>Acacia nilotica</i>         | 180 - 1000 (1 year, OTC)    | No                                    | ↑ Photosynthesis, WUE, and overall biomass<br>↓ gs<br>Light photosynthesis acclimation in the second season                                                                                                                                                                                                                                          | [22]      |
| <i>Alnus hirsuta</i>                                    | 360 x 720 (>1 year, GC)     | Phosphorus and drought                | ↑ Nodule biomass and N <sub>2</sub> fixation under high P availability                                                                                                                                                                                                                                                                               | [137]     |
| <i>Anacardium occidentale</i>                           | 380 x 760 (15 days, GC)     | Salt                                  | ↓ Photosynthesis without affecting gs and E<br>↓ Photosynthesis, gs, E, GLO activity and the contents of H <sub>2</sub> O <sub>2</sub> , NH <sub>4</sub> <sup>+</sup> , and glyoxylate under salinity<br>↑ NPQ, K <sup>+</sup> /Na <sup>+</sup> ratio, and the content of anthocyanin, sucrose, amino acid and total soluble proteins under salinity | [126]     |
| Angiosperm and gymnosperm tree species (57)             | 340-980                     | No                                    | ↓ gs according to the evolutionary scale (evergreen gymnosperms < deciduous angiosperms < evergreen angiosperms)                                                                                                                                                                                                                                     | [20]      |
| <i>Aulonemia aristulata</i>                             | 380 x 760 (3 weeks, OTC)    | No                                    | ↑ Photosynthesis, WUE, and overall biomass<br>↓ gs                                                                                                                                                                                                                                                                                                   | [58]      |
| <i>Betula papyrifera</i>                                | 380 x 550 (Long-term, FACE) | O <sub>3</sub>                        | ↑ Photosynthesis, specialized compounds, expression of glycolysis-related genes and farnesyl-PP and phytyl-PP<br>↓ Expression of pre-squalene and squalene synthesis genes, and leaf senescence                                                                                                                                                      | [135]     |
| <i>Betula papyrifera</i> and <i>Populus tremuloides</i> | 380 x 560 (Long-term, FACE) | O <sub>3</sub>                        | ↑ Photosynthesis, monosaccharides<br>↓ gs, leaf senescence                                                                                                                                                                                                                                                                                           | [136]     |
| <i>Betula pendula</i>                                   | 380 x 760 (~ 1 year, OTC)   | O <sub>3</sub>                        | ↓ Oxidative stress and senescence-related gene expression and proteins.                                                                                                                                                                                                                                                                              | [135]*    |
| <i>Betula pendula</i>                                   | 360 x 720 (3 years, OTC)    | O <sub>3</sub>                        | ↑ Photosynthesis, leaf dry weight, leaf area<br>↓ Photosynthetic protein content, Chl and PS density                                                                                                                                                                                                                                                 | [59]      |
| <i>Betula pendula</i>                                   | 360 x 720 (3 years, OTC)    | O <sub>3</sub>                        | ↑ Photosynthesis, starch, leaf area, stem diameter, biomass, and C/N ratio<br>↓ Total leaf N, Rubisco amount and activity, and leaf senescence                                                                                                                                                                                                       | [60,134]  |
| Betulaceae species                                      | 370 x 500 (2 years, FACE)   | Soil nutrition                        | ↓ Photosynthesis by lower C/N ratio                                                                                                                                                                                                                                                                                                                  | [56]      |
| <i>Coffea arabica</i>                                   | 400 x 700 (7 months, OTC)   | Drought                               | ↑ Photosynthesis, WUE, respiration, overall biomass, and root length<br>↓ Photorespiration rates and oxidative pressure                                                                                                                                                                                                                              | [49]      |
| <i>Coffea arabica</i>                                   | 400 x 700 (5 months, OTC)   | Drought                               | ↑ Faster stomatal closure, water potential, plant hydraulic conductance, aquaporin gene expression                                                                                                                                                                                                                                                   | [112]     |

|                                                             |                                 |                         |                                                                                                                                                                                                                                     |         |
|-------------------------------------------------------------|---------------------------------|-------------------------|-------------------------------------------------------------------------------------------------------------------------------------------------------------------------------------------------------------------------------------|---------|
|                                                             |                                 |                         | ↓ Whole plant transpiration<br>No association with $g_s$ or leaf ABA levels                                                                                                                                                         |         |
| <i>Coffea arabica</i>                                       | 390 x 600 (4 years, FACE)       | No                      | ↑ Photosynthesis, $g_s$ , WUE, growth, and soil carbon concentration<br>↓ Leaf area, diameter of the second-order axes                                                                                                              | [25]    |
| <i>Coffea arabica</i>                                       | 400 x 550 (4 years, FACE)       | Seasonal drought        | ↑ Photosynthesis in summer and winter, and the concentration of soluble carbohydrates, organic acids, and amino acids in leaves                                                                                                     | [68]    |
| <i>Coffea arabica</i>                                       | 400 x 760 (44 days, OTC)        | Drought                 | ↑ Photosynthesis, WUE, leaf water potential and carbohydrate concentration                                                                                                                                                          | [111]   |
| <i>Coffea arabica</i>                                       | 400 x 800 (40 days, OTC)        | Drought                 | ↑ Photosynthesis, iWUE, leaf concentration of 5-O-caffeoylquinic acid and caffeine                                                                                                                                                  | [113]   |
| <i>Coffea arabica</i>                                       | 390 x 550 (~2 years, FACE)      | No                      | ↑ Photosynthesis<br>↓ Photorespiration<br>No changes in stomatal and mesophyll conductance, leaf nitrogen and phosphorus concentrations                                                                                             | [24]    |
| <i>Coffea arabica</i>                                       | 380 x 700 (4.4 years, GC)       | Heat                    | ↓ Impact on physical and chemical traits of coffee beans<br>Preserved bean quality                                                                                                                                                  | [100]   |
| <i>Coffea arabica</i> and <i>Coffea canephora</i>           | 380 x 700 (1 year; GC)          | No                      | ↑ Photosynthesis, WUE, stomatal size, photosynthetic and respiratory proteins<br>↓ Stomatal density<br>No changes in PSII efficiency, non-structural carbohydrates, photosynthetic pigment and membrane permeability                | [40]    |
| <i>Coffea arabica</i> and <i>Coffea canephora</i>           | 380 x 700 (7 years, GC)         | Drought                 | ↑ Photosynthesis, photosynthetic proteins<br>↓ Energy dissipation and PSII impact<br>No correlation with stomatal closure and leaf ABA level                                                                                        | [114]   |
| <i>Coffea arabica</i> and <i>Coffea canephora</i>           | 380 x 700 (7 years, GC)         | Drought                 | ↑ Leaf amino acid concentration in <i>C. arabica</i><br>Little effect in leaf metabolite levels in <i>C. canephora</i>                                                                                                              | [115]*  |
| <i>Coffea arabica</i> and <i>Coffea canephora</i>           | 380 x 700 (10 months, GC)       | Heat                    | No clear pattern between transcriptomic data and the mitigating role of $e[CO_2]$ suggesting post-transcriptional modifications                                                                                                     | [99]*   |
| <i>Coffea arabica</i> and <i>Coffea canephora</i>           | 380 x 700 (10 months, GC)       | Heat                    | ↑ Gene expression and activity of glutathione reductase, catalase, Cu- and Zn-superoxide dismutase, ascorbate peroxidase and gene expression of HSP70, ELIPs, and chaperonins<br>↓ Reactive oxygen species and PSII photoinhibition | [98]    |
| <i>Coffea arabica</i> and <i>Coffea canephora</i>           | 380 x 700 (10 months, GC)       | Heat                    | ↑ Photosynthesis (photochemical efficiency, energy use and biochemical functioning) and WUE.                                                                                                                                        | [96]    |
| Deciduous trees                                             | FACE                            | No                      | ↑ Leaf area index, WUE<br>↓ Photosynthesis (except in alder), light compensation point, $g_s$ of most species                                                                                                                       | [41]    |
| Ecosystem-scale relationship                                | FACE                            | No                      | ↑ Plant productivity and N acquisition positive correlation<br>↓ Plant N concentration regardless of productivity                                                                                                                   | [53]    |
| Eucalyptus forest                                           | 400 x 550 (5 years, FACE)       | No                      | ↑ N/P ratio in sapwood<br>↓ N concentration and N/P ratio in young leaf<br>No changes in P concentration                                                                                                                            | [51]    |
| <i>Eucalyptus saligna</i>                                   | 380 x 680 (5 months, GC)        | Seasonal drought        | ↑ Leaf day respiration<br>No changes in seasonal acclimation                                                                                                                                                                        | [65]    |
| <i>Eucalyptus saligna</i> and <i>Eucalyptus sideroxylon</i> | 290 x 400 x 650 (~4 months, GC) | Drought and temperature | Contrasting photosynthetic response between genotypes under drought<br>No beneficial effect under elevated temperature and drought                                                                                                  | [19]    |
| Eucalyptus species                                          | 290 x 400 x 650 (~4 months, GC) | Heat                    | ↑ Photosynthesis, maximal electron transport rate and carboxylation rate, and growth                                                                                                                                                | [93,97] |
| <i>Eucalyptus tereticornis</i>                              | 400 x 640 (4 months, GC)        | Heat x Phosphorus       | ↑ Total dry biomass, leaf number, leaf area under high P supply                                                                                                                                                                     | [138]   |
| Forest species                                              | long-term field-based studies   | Review                  | ↓ $g_s$ mostly in young, deciduous and water-stressed trees<br>No acclimation of $g_s$                                                                                                                                              | [35]    |
| <i>Liquidambar styraciflua</i>                              | Long-term FACE                  | Seasonal drought        | ↓ Sap flow, $g_s$ , leaf senescence                                                                                                                                                                                                 | [108]   |
| <i>Liquidambar styraciflua</i>                              | 370 x 570 (2 years; FACE)       | No                      | ↑ Number of mitochondria, mass per area, and starch in leaves<br>No changes in leaf respiration                                                                                                                                     | [66]    |
| Mature forest                                               | ambient x +150 ppm (FACE)       | No                      | ↑ C uptake through gross primary production and soil respiration                                                                                                                                                                    | [70]    |

|                                                                                                                     |                                      |                   |                                                                                                                                                                                                                                                                                                                      |        |
|---------------------------------------------------------------------------------------------------------------------|--------------------------------------|-------------------|----------------------------------------------------------------------------------------------------------------------------------------------------------------------------------------------------------------------------------------------------------------------------------------------------------------------|--------|
| <i>Morus multicaulis</i> Perr.                                                                                      | 410/460 x 710/760 ppm (4 months, GC) | No                | ↑ Plant height, stem diameter, number of leaves, biomass production, and P and K uptake<br>↓ Photosynthesis, gs, transpiration and concentration of chlorophyll, and N and P in leaves and roots                                                                                                                     | [52]   |
| <i>Olea europaea</i>                                                                                                | 360 x 700 (3 months, GC)             | Salt              | ↑ Photosynthesis, and WUE<br>↓ NaCl content in plant tissue, PSII efficiency and chlorophyll                                                                                                                                                                                                                         | [125]  |
| ( <i>Populus tomentosa</i> x <i>P. bolleana</i> ) x <i>P. tomentosa</i>                                             | 385x550x720 (3 months; GC)           | No                | ↑ Stem diameter, gibberellic acid, cytokinin zeatin riboside<br>↓ Photosynthesis, abscisic acid<br>DEGs in leaves were involved in metabolic processes (77.55%) and response to stimulus of external environment (14.29%). Aldehyde dehydrogenase and pyruvate kinase were the core interconnected with other genes. | [76]*  |
| <i>Pinus densiflora</i>                                                                                             | 350 x 700 (73 days; GC)              | Phosphorus        | ↑ P requirement, and shoot growth<br>No changes in photosynthesis and stomatal conductance                                                                                                                                                                                                                           | [37]   |
| <i>Pinus halepensis</i>                                                                                             | 421 x 867 (18 months, GC)            | Heat and drought  | ↑ Photosynthesis, WUE, root protein stability<br>↓ Respiration<br>Little effect in combined stress                                                                                                                                                                                                                   | [110]* |
| <i>Pinus massoniana</i>                                                                                             | 400 x 800 (0 to 24 h, GC)            | No                | ↑ Expression of glycolysis, carboxylic acid cycle, PPP pathway, sucrose synthesis, gibberellin, salicylic acid, brassinolide and methyl jasmonate pathways related genes<br>↓ Expression of photosynthetic, and abscisic acid-related genes                                                                          | [67]*  |
| <i>Pinus radiata</i>                                                                                                | 370 x 650 (3 years, OTC)             | Nitrogen          | ↑ Stem basal area in high-N supply, and sapwood density<br>No changes in N status and lignification                                                                                                                                                                                                                  | [77]   |
| <i>Pinus sylvestris</i>                                                                                             | 380 x 580 (5 months, OTC)            | Heat and nitrogen | ↑ Radial growth, latewood density and maximum intra-ring density, thicker (alone) or thinner (+heat) tracheid walls<br>↓ Cellulose concentration, number of tracheids                                                                                                                                                | [78]   |
| <i>Pinus sylvestris</i> and <i>Pinus nigra</i>                                                                      | 390 x 570 (4 months, FACE)           | Drought           | No changes in starch concentrations, biomass production and mortality                                                                                                                                                                                                                                                | [109]  |
| <i>Pinus taeda</i>                                                                                                  | 380 x 600 (4 months; FACE)           | Seasonal drought  | ↑ Photosynthesis under eCO <sub>2</sub> , except at peak drought<br>No changes in water-saving and gs                                                                                                                                                                                                                | [36]   |
| <i>Populus</i>                                                                                                      | 380 x 550 (2 years, FACE)            | No                | ↑ Photosynthesis<br>↓ Leaf senescence, leaf area index, and chlorophyll content                                                                                                                                                                                                                                      | [73]   |
| <i>Populus</i> × <i>euramericana</i>                                                                                | 380 x 550 (6 years, FACE)            | No                | ↑ DEGs in young leaves (developmental response related – xyloglucan endotransglycosylase and calcium-signalling)<br>↓ DEGs in semimature leaves (Photosynthesis, chloroplast biogenesis- and function-related)                                                                                                       | [61]*  |
| <i>Populus deltoides</i>                                                                                            | 400 x 800 x 1200 (3 years; FACE)     | No                | ↑ Leaf area, stem biomass, expression of genes involved with storage proteins, cell wall expansion in leaves and lignin formation and polymerisation or ethylene response factors in stems.                                                                                                                          | [74]*  |
| <i>Populus deltoides</i>                                                                                            | 400 x 800 (3 years, GC)              | Drought and VPD   | ↑ Leaf area, leaf loss under drought, stomatal density<br>↓ Woody density                                                                                                                                                                                                                                            | [107]  |
| <i>Populus tremuloides</i>                                                                                          | 372 x 560 (~3 months, FACE)          | No                | ↑ Photosynthesis and stem volume, expression of genes related to active defense/response to stress, carbohydrate/starch biosynthesis and growth in the CO <sub>2</sub> -responsive clone, and passive defense (e.g. lignin, phenylpropanoid) and cell wall thickening in the CO <sub>2</sub> -unresponsive clone     | [62]*  |
| <i>Populus tremuloides</i>                                                                                          | 360 x 560 (5 years; FACE)            | O <sub>3</sub>    | ↑ Expression chloroplast 30S ribosomal, PSII, and auxin-binding related genes<br>↓ Expression of Rubisco activase genes                                                                                                                                                                                              | [72]*  |
| <i>Populus tremuloides</i>                                                                                          | 380 x 560 (~4 months, FACE)          | O <sub>3</sub>    | ↓ Chlorophyll and carotenoid concentration, activity of antioxidant enzymes and PAL and expression of 1-aminocyclopropane-1-carboxylic acid (ACC)-oxidase transcript                                                                                                                                                 | [21]   |
| <i>Populus</i> × <i>euramericana</i>                                                                                | 380 x 550 (2 years, FACE)            | No                | ↑ Pathways for secondary metabolism (anthocyanin biosynthesis) and glycolysis during senescence, LDOX (leucoanthocyanidin dioxygenase) and DFR (dihydroflavonol reductase) related transcripts                                                                                                                       | [75]*  |
| <i>Populus</i> × <i>euramericana</i>                                                                                | 370 x 550 (Long-term, FACE)          | No                | ↑ Cell expansion and production, basipetal gradient of leaf development                                                                                                                                                                                                                                              | [81]   |
| ( <i>Quercus mongolica</i> and <i>Kalopanax septemlobus</i> ) ( <i>Betula maximowicziana</i> and <i>Acer mono</i> ) | 370 x 500 (4 years, FACE)            | No                | ↑ Plant height, photosynthesis and vessel area in <i>K. septemlobus</i> and vessels in all species, except <i>B. maximowicziana</i> and number of cambial cells in two ring-porous species                                                                                                                           | [57]   |

|                      |                          |                  |                                          |       |
|----------------------|--------------------------|------------------|------------------------------------------|-------|
| <i>Quercus rubra</i> | 380 x 700 (4 months, GC) | Heat and drought | ↑ Photosynthesis and biomass in heatwave | [139] |
|----------------------|--------------------------|------------------|------------------------------------------|-------|
